# Supplementary material
Source: publisher figshare collection journal article supplement (https://rs.figshare.com/ndownloader/files/16257422)
Supplement: Supplementary file 1 [file 16257422]

Supplementary Tables: Implementing hospital-based zoonotic disease surveillance in Bangladesh: design, field data, and Difficulties

**Supplementary table 1**

Potential zoonotic exposures associated with positive diagnostic test results among hospitalized patients

| **Test positive** | **Occupation: Butcher** | **Date palm sap consumption** | **Slaughter sick domestic** | **Bitten by wild animal** | **Slaughter wild animal** | **Total** |
| --- | --- | --- | --- | --- | --- | --- |
| Nipah | 0 | 21 (95%) | 1 (5%) | 0 | 0 | 22 (100%) |
| JE | 0 | 0 | 3 (100%) | 0 | 0 | 3 (100%) |
| Influenza | 0 | 1 (25%) | 3 (75%) | 0 | 0 | 4 (100%) |
| Other resp. viruses | 0 | 1 (50%) | 1 (50%) | 0 | 0 | 2 (100%) |
| No positive result | 1 (0.5%) | 127 (54%) | 97 (40%) | 11 (4%) | 1. (2%) | 237(100%)* |

*Some patients had multiple exposures

**Supplementary table 2**

Factors associated with presence of IgM antibodies to Nipah virus among hospitalized patients with recent potential zoonotic exposures.

| **Characteristics** | **Nipah test positive (%)**  **(n=22)** | **OR** | **(95% CI)** |
| --- | --- | --- | --- |
| Age (Adult vs. Age) |  |  |  |
| ≥ 18 years | 6 (27%) | Ref | -- |
| <18 years | 16 (73%) | **3.5** | **1.3-9.4** |
| Gender |  |  |  |
| Male | 17 (77%) | Ref | -- |
| Female | 5 (23%) | 0.6 | 0.2-1.6 |
| Presenting surveillance platform |  |  |  |
| Respiratory Illness | 0 (0%) | Ref | -- |
| Meningoencephalitis | 22 (100%) | **-** | **-** |
| Date Palm Sap consumption |  |  |  |
| No | 1 (5%) | Ref | -- |
| Yes | 21 (95%) | **19.0** | **2.5-143.0** |
| Contact with sick domestic animal |  |  |  |
| No | 21 (95%) | Ref | -- |
| Yes | 1 (5%) | **0.06** | **0.008-0.5** |
| Bitten/scratched by wild animal |  |  |  |
| No | 22 (100%) | Ref | -- |
| Yes | 0 (0%) | - | - |
| Death in hospital |  |  |  |
| No | 13 (59%) | Ref | -- |
| Yes | 9 (41%) | **4.4** | **1.8-11.2** |

**Abbreviations:** OR: odds ratio; CI: Confidence interval

**Supplementary table 3**

Factors associated with patient death in hospitals and test results r among hospitalized patients with recent potential zoonotic exposures.

| **Test category** | **Total patient** | **Number of death in hospital**  Number (% of category total) | **OR (95% CI)** |
| --- | --- | --- | --- |
| Testing negative or no test result returned |  | 32(14%) | Ref |
| Any test positive | 31 | 10 (32%) | **3.0 (1.3-7.0)** |
| Nipah Positive | 22 | 9 (41%) | **4.4 (1.7-11.2)** |
| JE Positive | 3 | 0 | - |
| Influenza Positive | 4 | 0 | - |
| Other resp. viruses (RSV, Adenovirus) Positive | 2 | 1 (50%) | 6.4 (0.4-105) |
